# Supplementary material for: PRKCA Overexpression Is Frequent in Young Oral Tongue Squamous Cell Carcinoma Patients and Is Associated with Poor Prognosis
Source: MDPI journal article supplement (doi:10.3390/cancers13092082), 2021-04-25
Supplement: s1 [file s1]

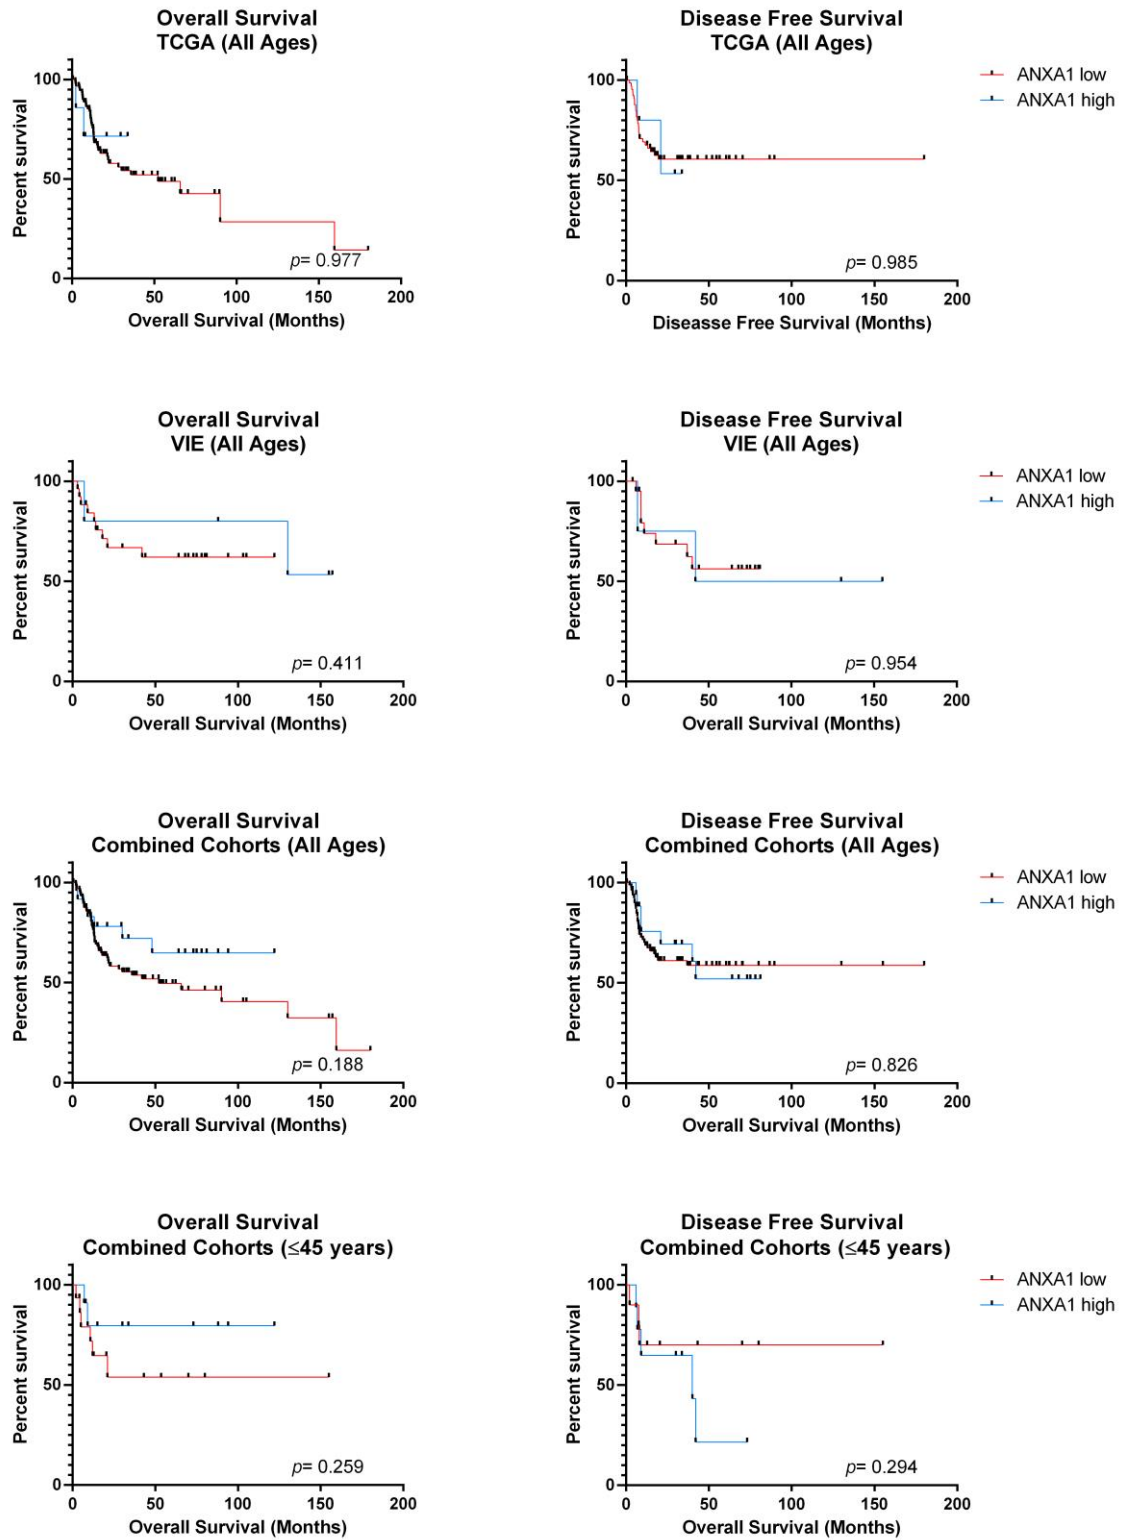

**Figure S1.** Kaplan-Meier survival curves in relation to Annexin 1 overexpression.

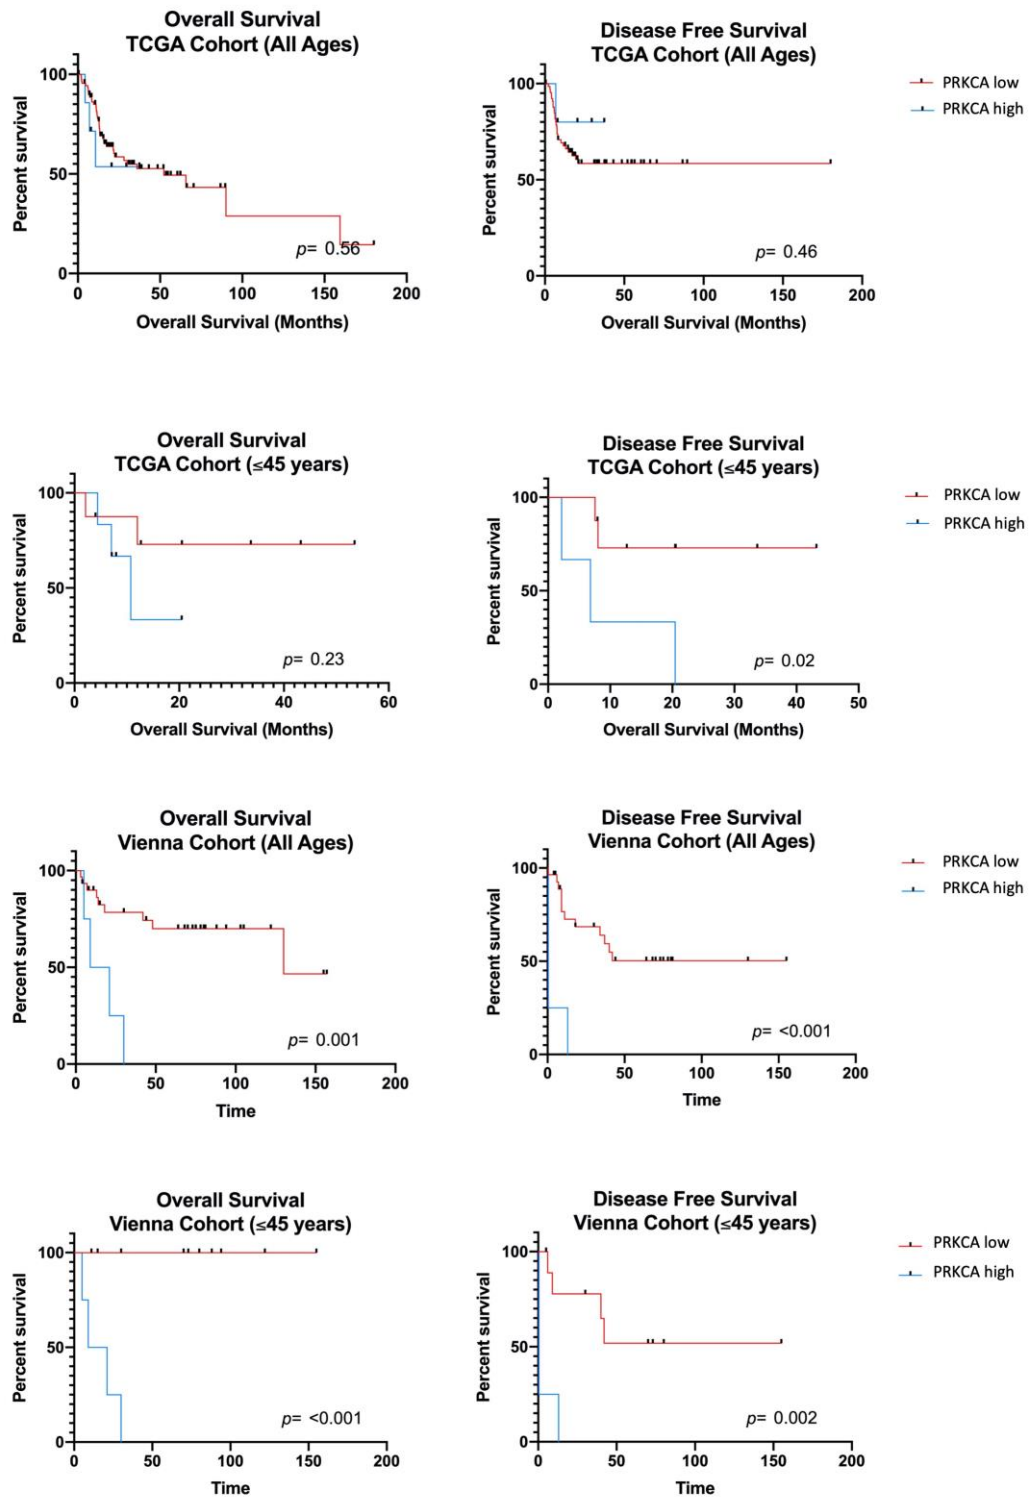

**Figure S2.** Kaplan-Meier survival curves in relation to PRKCA protein overexpression in all subgroups.

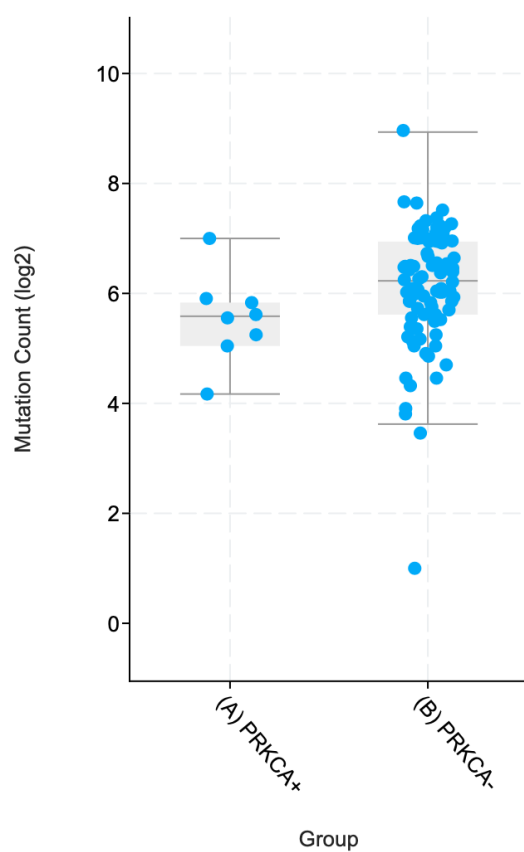

**Figure S3.** Box plots of total mutation count (log transformed) in PRKCA high versus low TCGA samples.
